# Supplementary material for: Chemical synthesis, characterisation and gas sensing performance of copper oxide nanoribbons
Source: Royal Society of Chemistry journal article supplement (doi:10.1039/b716745h), 2008-01-01
Supplement: b716745h.pdf [file b716745h.pdf]

## Chemical synthesis, characterisation and gas sensing performance of copper oxide nanoribbons

Xinglong Gou, Guoxiu Wang\*, Juan Yang, Jinsoo Park, and David Wexler

\* Corresponding author, email: gwang@uow.edu.au

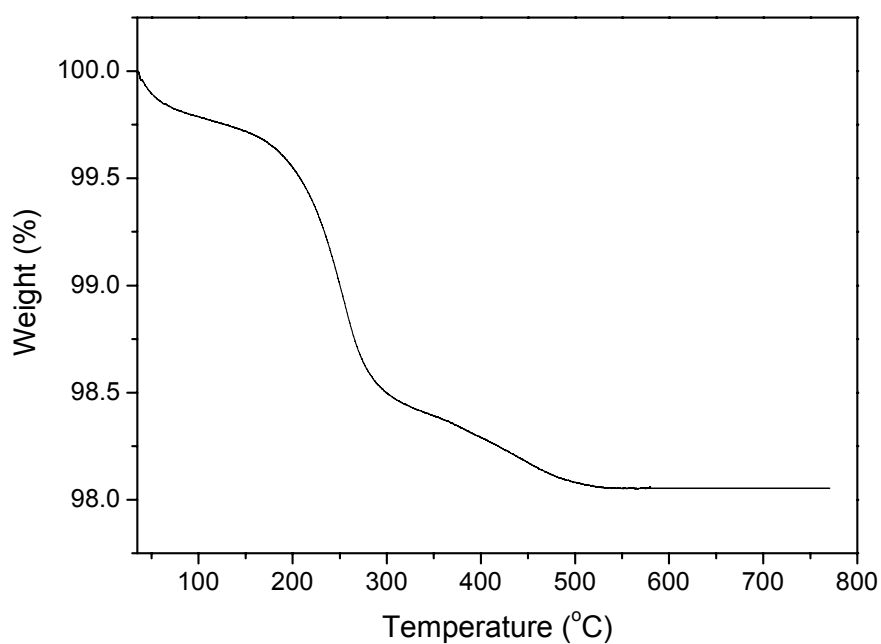

Fig. S-1 TGA curve of CuO nanoribbons, showing the existing of 2 wt% SDBS surfactant.

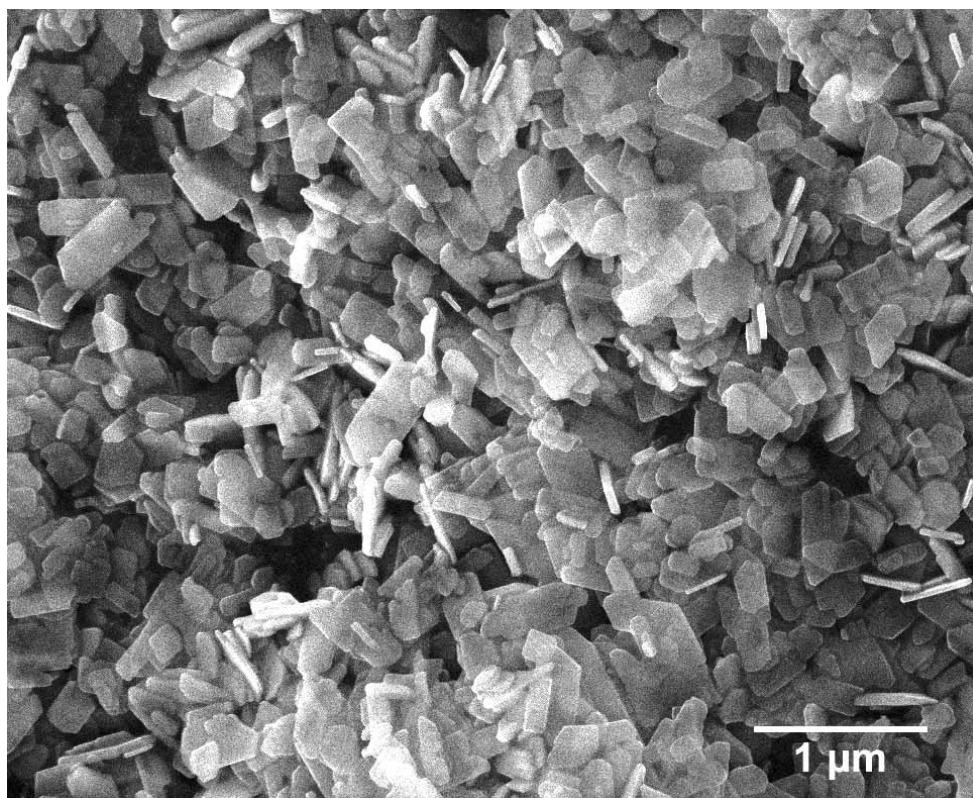

Fig. S-2 SEM image of CuO nanoplates.

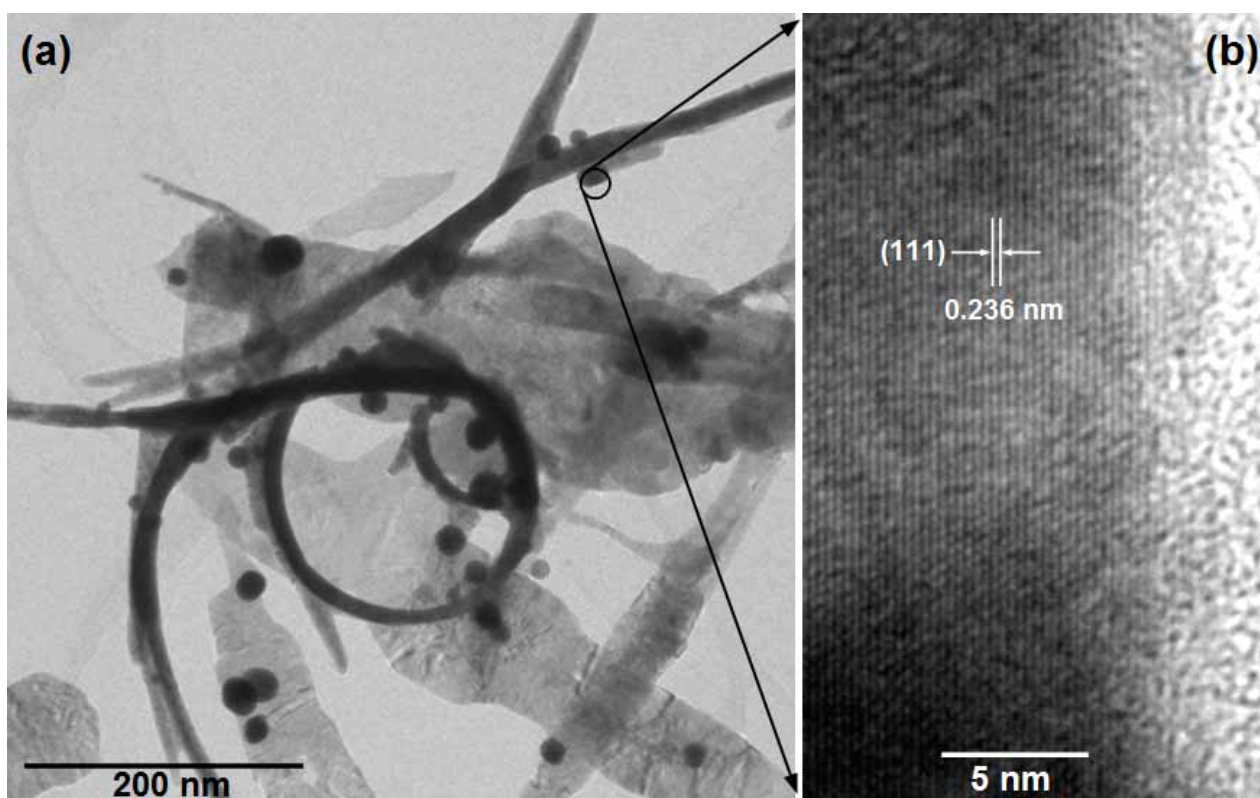

Fig. S-3 (a) TEM image Au loaded CuO nanoribbons; (b) HRTEM image of the Au nanoparticle. It clearly shows the (111) lattice planes of Au with the interplanar spacing of 0.236 nm.

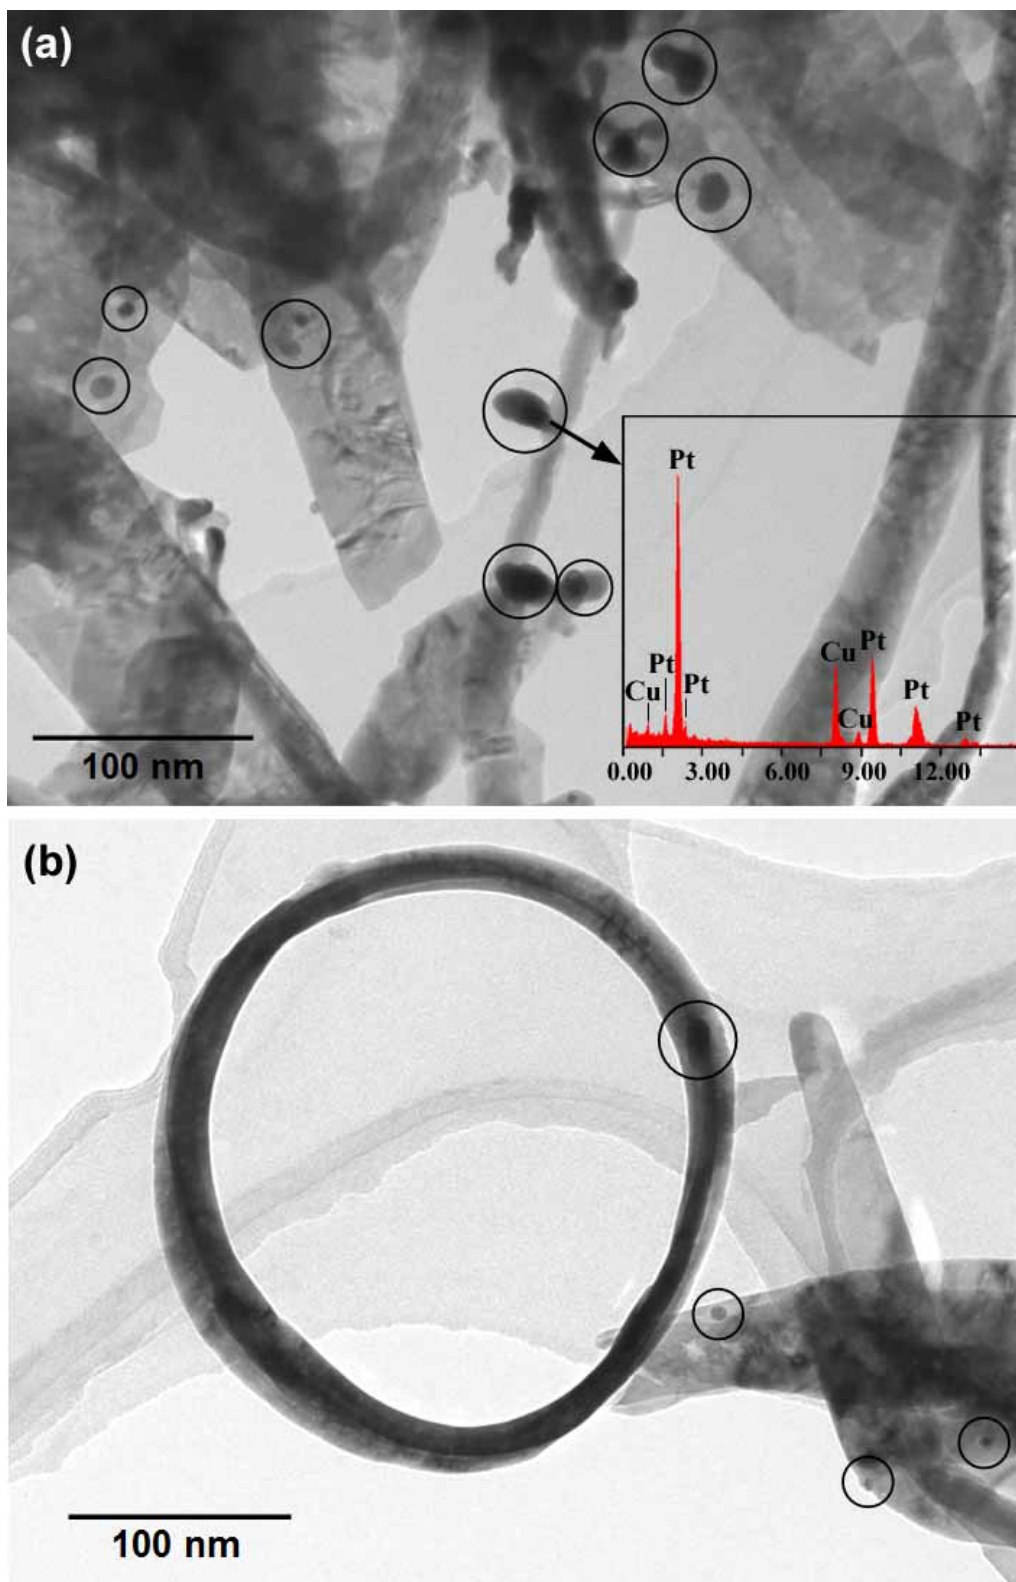

Fig. S-4 (a) TEM image of Pt loaded CuO nanoribbons. The inset is the EDS spectra of a Pt nanoparticle. (b) TEM image of a CuO nanoring and nanoribbons with the loading of Pt nanoparticles.
